# Supplementary material for: Differentially Methylated DNA Regions and Left Ventricular Hypertrophy in African Americans: A HyperGEN Study
Source: MDPI journal article supplement (doi:10.3390/genes13101700), 2022-09-22
Supplement: s1 [file s1]

| <b>Table S1. HyperGEN EWAS Family Structure</b>                                                                                                                                                                               |                    |          |          |          |          |
|-------------------------------------------------------------------------------------------------------------------------------------------------------------------------------------------------------------------------------|--------------------|----------|----------|----------|----------|
|                                                                                                                                                                                                                               | <b>Family Size</b> |          |          |          |          |
|                                                                                                                                                                                                                               | <b>1</b>           | <b>2</b> | <b>3</b> | <b>4</b> | <b>5</b> |
| Members per family                                                                                                                                                                                                            | 334                | 82       | 30       | 4        | 2        |
| Parent-child pairs                                                                                                                                                                                                            | 46                 |          |          |          |          |
| Full sibling pairs                                                                                                                                                                                                            | 42                 |          |          |          |          |
| <i>EWAS: epigenome-wide association study. Members per family describes the number of distinct family clusters. For example, for Family Size = 2, there are 82 families with 2 members (82 x 2 = 164 total participants).</i> |                    |          |          |          |          |

**Table S2. Selected EWAS results from HyperGEN.**

| Trait                                                                                                                                                                                                                                                                                                                                         | Chr   | Gene       | CpG               | $\beta$    | SE     | FDR      |
|-----------------------------------------------------------------------------------------------------------------------------------------------------------------------------------------------------------------------------------------------------------------------------------------------------------------------------------------------|-------|------------|-------------------|------------|--------|----------|
| LASD                                                                                                                                                                                                                                                                                                                                          | 19    | GNA11      | cg05370802        | -0.0062    | 0.0009 | 5.36E-09 |
|                                                                                                                                                                                                                                                                                                                                               |       |            | cg18505103        | -0.0017    | 0.0003 | 2.93E-06 |
|                                                                                                                                                                                                                                                                                                                                               | 10    | PANK1      | cg00257187        | -0.0101    | 0.0017 | 3.41E-06 |
|                                                                                                                                                                                                                                                                                                                                               | 7     |            | cg17512207        | -0.0158    | 0.0027 | 8.13E-06 |
|                                                                                                                                                                                                                                                                                                                                               | 15    | SLC24A1    | cg07116160        | -0.0106    | 0.0020 | 1.28E-04 |
|                                                                                                                                                                                                                                                                                                                                               | 14    |            | cg05015996        | -0.0088    | 0.0018 | 2.48E-03 |
|                                                                                                                                                                                                                                                                                                                                               | 8     | ENTPD4     | cg04712321        | 0.0168     | 0.0037 | 0.020    |
|                                                                                                                                                                                                                                                                                                                                               | 14    | KCNK10     | cg12095807        | -0.0083    | 0.0018 | 0.020    |
|                                                                                                                                                                                                                                                                                                                                               | 7     |            | cg22886275        | 0.0135     | 0.0030 | 0.020    |
|                                                                                                                                                                                                                                                                                                                                               | 5     |            | cg01195564        | -0.0160    | 0.0036 | 0.035    |
|                                                                                                                                                                                                                                                                                                                                               | 1     |            | cg09132102        | -0.0163    | 0.0037 | 0.035    |
|                                                                                                                                                                                                                                                                                                                                               | 6     | TRIM15     | cg13252226        | -0.0161    | 0.0037 | 0.041    |
|                                                                                                                                                                                                                                                                                                                                               | 14    |            | cg18991417        | 0.0147     | 0.0034 | 0.041    |
|                                                                                                                                                                                                                                                                                                                                               | 10    |            | cg23939236        | -0.0087    | 0.0020 | 0.044    |
|                                                                                                                                                                                                                                                                                                                                               | 13    |            | cg11508437        | -0.0085    | 0.0020 | 0.071    |
|                                                                                                                                                                                                                                                                                                                                               | 17    | MPRIIP     | cg23842572        | 0.0119     | 0.0028 | 0.071    |
|                                                                                                                                                                                                                                                                                                                                               | LVIDD | 16         | VAC14             | cg00370608 | 0.0120 | 0.0025   |
| 9                                                                                                                                                                                                                                                                                                                                             |       | NCRNA00092 | cg00462570        | 0.0169     | 0.0035 | 0.056    |
| 3                                                                                                                                                                                                                                                                                                                                             |       | TRAK1      | <b>cg23715029</b> | 0.0229     | 0.0049 | 0.056    |
| 6                                                                                                                                                                                                                                                                                                                                             |       | JARID2     | cg26797722        | 0.0102     | 0.0022 | 0.056    |
| MWS                                                                                                                                                                                                                                                                                                                                           | 6     | MAS1L      | cg07511633        | 0.0024     | 0.0004 | 0.012    |
|                                                                                                                                                                                                                                                                                                                                               |       | B3GAT2     | cg10766373        | -0.0006    | 0.0001 | 0.064    |
|                                                                                                                                                                                                                                                                                                                                               | 17    |            | cg05720491        | 0.0016     | 0.0003 | 0.064    |
|                                                                                                                                                                                                                                                                                                                                               | 22    |            | cg19115805        | -0.0012    | 0.0003 | 0.064    |
| RWT                                                                                                                                                                                                                                                                                                                                           | 11    | DNHD1      | cg10703481        | -0.129     | 0.0224 | 0.076    |
|                                                                                                                                                                                                                                                                                                                                               |       |            | <b>cg22908616</b> | -0.1526    | 0.0270 | 0.076    |
|                                                                                                                                                                                                                                                                                                                                               |       |            | <b>cg16126079</b> | -0.1210    | 0.0216 | 0.076    |
| EWAS results with FDR < 0.1. Chr: chromosome. Linear mixed models adjusted for age, sex, BMI, recruitment center, cell counts, ancestry principal components, family relatedness (random), and batch (random). Boldface indicates CpG was part of a significant DMR in main analysis. There were no significant CpG sites associated with EF. |       |            |                   |            |        |          |

**Table S3. Association of *DNHD1* DMR with RWT in HyperGEN using family and batch-adjusted residuals.**

| <b>Residuals</b>                                                                                                                                                                                                                         | <b><math>\beta</math>(SE)</b> | <b>P</b> |
|------------------------------------------------------------------------------------------------------------------------------------------------------------------------------------------------------------------------------------------|-------------------------------|----------|
| Family <sup>#</sup>                                                                                                                                                                                                                      | -0.1194(0.0238)               | 5.34e-07 |
| Family & batch <sup>##</sup>                                                                                                                                                                                                             | -0.1236(0.0223)               | 3.09e-08 |
| <sup>#</sup> Family ID as a random effect. <sup>##</sup> Family ID and batch as random effects.<br>Models adjusted for age, sex, BMI, recruitment center, ancestry principal components, cell counts, and batch (family-only residuals). |                               |          |
